# Supplementary material
Source: PubMed Central journal article supplement (PMC4957186)
Supplement: jcsm.12.8.1089a.pdf [file jcsm.12.8.1089a.pdf]

**Table S1.** Relationship between demographic, clinical features and PLMS index > 15/h in patients with RLS

| <i>Variables</i>                            | <i>OR</i> | <i>(95 % CI)</i> | <i>P-value</i> * |
|---------------------------------------------|-----------|------------------|------------------|
| Age (per one year increase)                 | 1.035     | (1.008-1.062)    | 0.010            |
| Gender (man)                                | 2.107     | (1.145-3.877)    | 0.017            |
| BMI (per one unit increase)                 | 0.981     | (0.935-1.029)    | 0.434            |
| Duration of illness (per one year increase) | 1.038     | (0.986-1.093)    | 0.158            |
| Age of onset < 45 y (yes vs. no)            | 1.028     | (0.996-1.061)    | 0.090            |
| Family history (yes vs.no)                  | 1.053     | (0.564-1.965)    | 0.870            |
| IRLS (per one unit increase)                | 0.975     | (0.935-1.061)    | 0.239            |
| Ferritin level < 50ng/mL (yes. Vs no)       | 1.202     | (0.660-2.188)    | 0.547            |

BMI, body mass index; IRLS; international restless legs syndrome scores;

\* Statistical analysis by logistic regression models

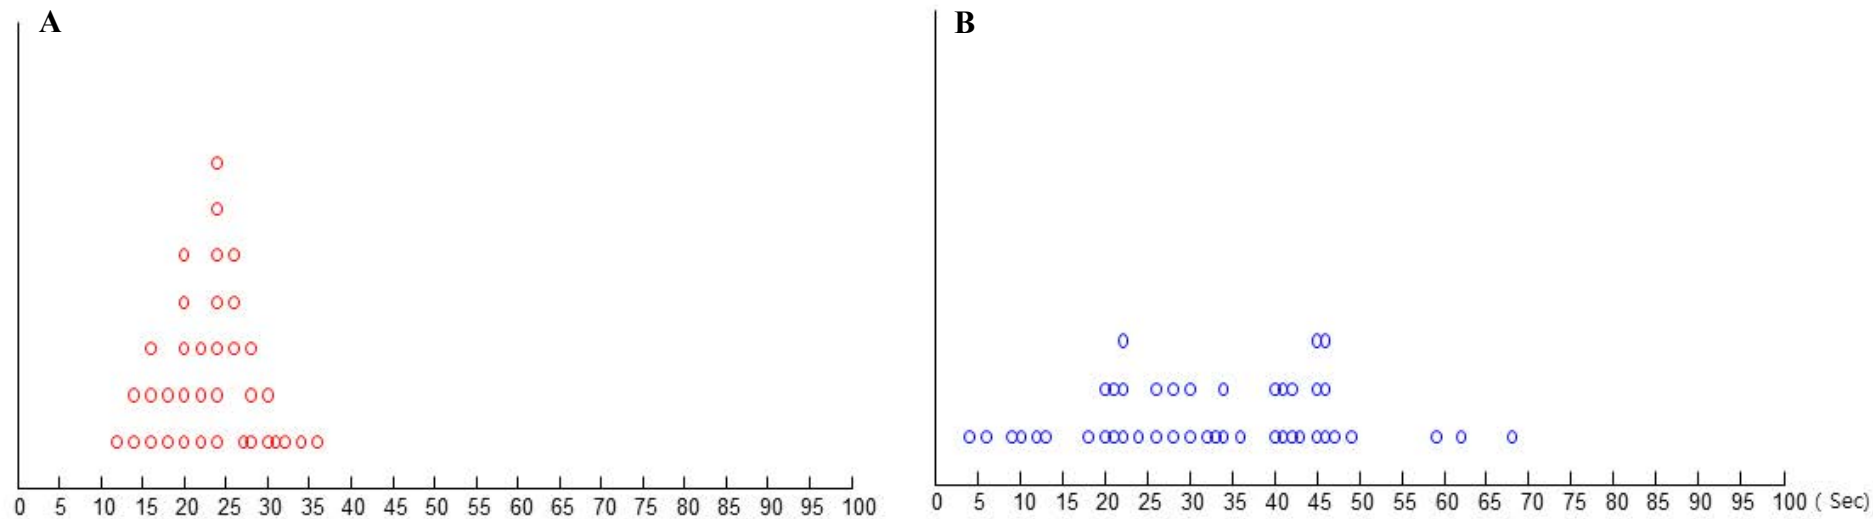

**Figure S1.** Comparison of distributions of median inter-leg movement interval on one night polysomnography of each patient with rest legs syndrome (A) with PLMS ( PLMS index > 15/h, n = 36) and (B) without PLMS (PLMS index ≤ 15/h, n = 48).
